# Supplementary material for: Timing for the second fecal microbiota transplantation to maintain the long-term benefit from the first treatment for Crohn’s disease
Source: PubMed Central journal article supplement (PMC6311185; doi:10.1007/s00253-018-9447-x), 2018-10-24
Supplement: 253_2018_9447_MOESM1_ESM.pdf [file 253_2018_9447_MOESM1_ESM.pdf]

## **Supplementary material**

### **Applied Microbiology and Biotechnology**

#### **Timing for the second fecal microbiota transplantation to maintain the long-term benefit from the first treatment for Crohn's disease**

Pan Li<sup>1,2</sup>, Ting Zhang<sup>1,2</sup>, Yandong Xiao<sup>3,4</sup>, Liang Tian<sup>3</sup>, Bota Cui<sup>1,2</sup>, Guozhong Ji<sup>1,2</sup>, Yang-Yu Liu<sup>3,5</sup>, Faming Zhang<sup>1,2</sup>

<sup>1</sup> Medical Center for Digestive Diseases, the Second Affiliated Hospital of Nanjing Medical University, Nanjing 210011, China.

<sup>2</sup> Key Lab of Holistic Integrative Enterology, Nanjing Medical University, Nanjing 210011, China.

<sup>3</sup> Channing Division of Network Medicine, Brigham and Women's Hospital and Harvard Medical School, Boston, Massachusetts 02115, United States.

<sup>4</sup> Science and Technology on Information Systems Engineering Laboratory, National University of Defense Technology, Changsha 410073, China.

<sup>5</sup> Center for Cancer Systems Biology, Dana-Farber Cancer Institute, Boston, Massachusetts 02115, United States.

Pan Li and Ting Zhang contributed equally to this study.

#### **Corresponding author:**

Faming Zhang, MD, PhD

Professor of Medicine

Director of Intestinal Diseases

The Second Affiliated Hospital of Nanjing Medical University

Tel: +86-25-58509883

E-mail address: [fzhang@njmu.edu.cn](mailto:fzhang@njmu.edu.cn)

ORCID: 0000-0003-4157-1144

Yang-Yu Liu, PhD

Assistant Professor at Harvard Medical School

Associate Scientist at Brigham and Women's Hospital

Tel: +1-617-525-2714

E-mail address: [yyl@channing.harvard.edu](mailto:yyl@channing.harvard.edu)

ORCID: 0000-0003-4184-5379

### **Supplemental Table Legends**

**Supplemental Table S1** Gut microbial compositions in CD patients and donors at the phylum level.

**Supplemental Table S2** Gut microbial compositions in CD patients and donors at the family level.

**Supplemental Table S3** Gut microbial compositions in CD patients and donors at the genus level.

**Supplemental Table S4** Gut microbial compositions in CD patients before and after FMT at the family level.

**Supplemental Table S5** Gut microbial compositions in CD patients before and after FMT at the genus level.

**Supplemental Table S1** Gut microbial compositions in CD patients and donors at the phylum level.

| Phylum               | Donor (%)       | Patient pre-1 <sup>st</sup> -FMT (%) | <i>p</i> -value |
|----------------------|-----------------|--------------------------------------|-----------------|
| <i>Cyanobacteria</i> | 0.0283 ± 0.0371 | 0.0197 ± 0.0591                      | 0.023           |
| <i>Fusobacteria</i>  | 0.0811 ± 0.1506 | 9.97 ± 15.33                         | 0.030           |
| <i>Firmicutes</i>    | 48.33 ± 24.11   | 27.59 ± 14.35                        | 0.047           |

**Supplemental Table S2** Gut microbial compositions in CD patients and donors at the family level.

| Family                     | Donor (%)     | Patient pre-1 <sup>st</sup> -FMT (%) | <i>p</i> -value | FDR    |
|----------------------------|---------------|--------------------------------------|-----------------|--------|
| <i>Ruminococcaceae</i>     | 23.62 ± 11.36 | 3.43 ± 2.91                          | 0.0013          | 0.0825 |
| <i>Clostridiaceae</i>      | 2.27 ± 3.44   | 0.46 ± 0.69                          | 0.0243          | 0.2665 |
| <i>Enterobacteriaceae</i>  | 1.86 ± 3.26   | 15.34 ± 24.65                        | 0.0380          | 0.2687 |
| <i>Coriobacteriaceae</i>   | 0.12 ± 0.19   | 0.02 ± 0.03                          | 0.0054          | 0.1427 |
| <i>Fusobacteriaceae</i>    | 0.08 ± 0.15   | 9.95 ± 15.34                         | 0.0302          | 0.2665 |
| <i>Bifidobacteriaceae</i>  | 0.06 ± 0.06   | 0.12 ± 0.35                          | 0.0095          | 0.2010 |
| <i>Bacteroidales_S24-7</i> | 0.04 ± 0.04   | 0.007 ± 0.006                        | 0.015           | 0.2265 |
| <i>Comamonadaceae</i>      | 0.009 ± 0.007 | 0.002 ± 0.005                        | 0.0175          | 0.2325 |
| <i>Sphingomonadaceae</i>   | 0.008 ± 0.008 | 0.002 ± 0.007                        | 0.0395          | 0.2791 |
| <i>Pseudomonadaceae</i>    | 0.006 ± 0.005 | 0.0005 ± 0.002                       | 0.0030          | 0.1047 |
| <i>Carnobacteriaceae</i>   | 0.001 ± 0.002 | 0.01 ± 0.02                          | 0.0330          | 0.2665 |

**Supplemental Table S3** Gut microbial compositions in CD patients and donors at the genus level.

| Genus                   | Donor (%)      | Patient pre-1 <sup>st</sup> -FMT (%) | <i>p</i> -value | FDR    |
|-------------------------|----------------|--------------------------------------|-----------------|--------|
| <i>Ruminococcus</i>     | 0.330 ±0.342   | 2.115 ±5.521                         | 0.0023          | 0.0752 |
| <i>Anaerostipes</i>     | 0.378 ±0.731   | 0.058 ±0.170                         | 0.0124          | 0.2091 |
| <i>Bifidobacterium</i>  | 0.060 ±0.055   | 0.117 ±0.350                         | 0.0095          | 0.1924 |
| <i>Blautia</i>          | 1.282 ±1.040   | 0.875 ±1.980                         | 0.0469          | 0.3751 |
| <i>Collinsella</i>      | 0.093 ±0.174   | 0.004 ±0.009                         | 0.0376          | 0.3751 |
| <i>Coprococcus</i>      | 0.281 ±0.352   | 0.007 ±0.008                         | 0.0007          | 0.0632 |
| <i>Dorea</i>            | 0.746 ±0.652   | 0.431 ±1.080                         | 0.0092          | 0.1924 |
| <i>Enterobacter</i>     | 0.001 ±0.002   | 1.564 ±4.664                         | 0.0418          | 0.3751 |
| <i>Faecalibacterium</i> | 12.590 ±12.067 | 0.763 ±1.407                         | 0.0013          | 0.0632 |
| <i>Fusobacterium</i>    | 0.080 ±0.150   | 9.947 ±15.322                        | 0.0302          | 0.3751 |
| <i>Granulicatella</i>   | 0.001 ±0.002   | 0.010 ±0.013                         | 0.0330          | 0.3751 |
| <i>Lachnospira</i>      | 1.508 ±1.670   | 0.006 ±0.010                         | 0.0003          | 0.0632 |
| <i>Pseudomonas</i>      | 0.006 ±0.005   | 0.001 ±0.002                         | 0.0030          | 0.0752 |
| <i>Roseburia</i>        | 0.694 ±0.474   | 1.064 ±2.447                         | 0.0458          | 0.3751 |
| <i>Firmicutes_SMB53</i> | 0.530 ±0.850   | 0.031 ±0.065                         | 0.0029          | 0.0752 |
| <i>Sphingomonas</i>     | 0.008 ±0.008   | 0.002 ±0.007                         | 0.0395          | 0.3751 |

**Supplemental Table S4** Gut microbial compositions in CD patients before and after FMT at the family level.

| Family                     | Pre-1 <sup>st</sup> -FMT (%) | 3D post-1 <sup>st</sup> -FMT (%) | <sup>a</sup> <i>p</i> -value | FDR    | Pre-2 <sup>nd</sup> -FMT (%) | <sup>b</sup> <i>p</i> -value | FDR    |
|----------------------------|------------------------------|----------------------------------|------------------------------|--------|------------------------------|------------------------------|--------|
| <i>Bacteroidaceae</i>      | 36.70 ± 26.89                | 33.45 ± 19.07                    | 0.8886                       | 1.000  | 47.34 ± 17.95                | 0.4413                       | 0.938  |
| <i>Enterobacteriaceae</i>  | 15.34 ± 24.65                | 6.53 ± 8.25                      | 0.4008                       | 0.8603 | 3.45 ± 4.02                  | 0.3139                       | 0.7272 |
| <i>Veillonellaceae</i>     | 12.55 ± 12.28                | 13.97 ± 9.39                     | 0.7794                       | 1.000  | 9.97 ± 10.60                 | 0.6784                       | 1.000  |
| <i>Fusobacteriaceae</i>    | 9.95 ± 15.34                 | 11.36 ± 15.82                    | 0.8886                       | 1.000  | 5.83 ± 8.60                  | 0.6784                       | 1.000  |
| <i>Ruminococcaceae</i>     | 3.43 ± 2.91                  | 8.13 ± 8.52                      | 0.1614                       | 0.7481 | 11.45 ± 15.79                | 0.2604                       | 0.7272 |
| <i>Porphyromonadaceae</i>  | 2.07 ± 1.95                  | 5.19 ± 5.52                      | 0.208                        | 0.7481 | 4.21 ± 3.32                  | 0.0209                       | 0.7272 |
| <i>Clostridiaceae</i>      | 0.46 ± 0.69                  | 0.60 ± 0.69                      | 0.4008                       | 0.8603 | 0.43 ± 0.30                  | 0.9528                       | 1.000  |
| <i>Aeromonadaceae</i>      | 0.2 ± 0.56                   | 0.007 ± 0.018                    | 0.0431                       | 0.7481 | 0.018 ± 0.033                | 0.735                        | 1.000  |
| <i>Bifidobacteriaceae</i>  | 0.12 ± 0.35                  | 0.008 ± 0.01                     | 0.0679                       | 0.4696 | 0.06 ± 0.14                  | 0.7150                       | 1.000  |
| <i>Gemellaceae</i>         | 0.043 ± 0.072                | 0.079 ± 0.18                     | 0.753                        | 1.000  | 0.0019 ± 0.0023              | 0.0280                       | 0.7272 |
| <i>Desulfovibrionaceae</i> | 0.042 ± 0.068                | 0.11 ± 0.10                      | 0.0180                       | 0.7481 | 0.054 ± 0.074                | 0.161                        | 0.7272 |
| <i>Bacteroidales_S24-7</i> | 0.007 ± 0.006                | 0.01 ± 0.03                      | 0.3454                       | 0.7982 | 0.27 ± 0.58                  | 0.0663                       | 0.7272 |

<sup>a</sup> *p*-value shows differences in relative abundance between 3D post-1<sup>st</sup>-FMT/pre-1<sup>st</sup>-FMT.

<sup>b</sup> *p*-value shows differences in relative abundance between pre-2<sup>nd</sup>-FMT/pre-1<sup>st</sup>-FMT.

**Supplemental Table S5** Gut microbial compositions in CD patients before and after FMT at the genus level.

| Genus                   | Pre-1 <sup>st</sup> -FMT (%) | 3D post-1 <sup>st</sup> -FMT (%) | <sup>a</sup> <i>p</i> -value | FDR    | Pre-2 <sup>nd</sup> -FMT (%) | <sup>b</sup> <i>p</i> -value | FDR    |
|-------------------------|------------------------------|----------------------------------|------------------------------|--------|------------------------------|------------------------------|--------|
| <i>Ruminococcus</i>     | 2.115 ± 5.521                | 3.016 ± 3.967                    | 0.0357                       | 0.5101 | 1.841 ± 3.068                | 0.4413                       | 0.6995 |
| <i>Bilophila</i>        | 0.042 ± 0.068                | 0.088 ± 0.078                    | 0.0180                       | 0.5101 | 0.029 ± 0.059                | 0.7794                       | 0.8295 |
| <i>Faecalibacterium</i> | 0.763 ± 1.407                | 3.807 ± 7.291                    | 0.2076                       | 0.5101 | 3.265 ± 4.147                | 0.0382                       | 0.5562 |
| <i>Gemella</i>          | 0.022 ± 0.042                | 0.054 ± 0.128                    | 0.7532                       | 0.8175 | 0.001 ± 0.002                | 0.0277                       | 0.5562 |
| <i>Holdemania</i>       | 0.004 ± 0.008                | 0.179 ± 0.294                    | 0.0464                       | 0.5101 | 0.037 ± 0.055                | 0.0357                       | 0.5562 |
| <i>Parabacteroides</i>  | 2.069 ± 1.950                | 5.194 ± 5.521                    | 0.2076                       | 0.5101 | 4.214 ± 3.321                | 0.0209                       | 0.5562 |

<sup>a</sup> *p*-value shows differences in relative abundance between 3D post-1<sup>st</sup>-FMT/pre-1<sup>st</sup>-FMT.

<sup>b</sup> *p*-value shows differences in relative abundance between pre-2<sup>nd</sup>-FMT/pre-1<sup>st</sup>-FMT.
